# Supplementary material for: Differential Effects of 25-Hydroxyvitamin D3 versus 1α 25-Dihydroxyvitamin D3 on Adipose Tissue Browning in CKD-Associated Cachexia
Source: MDPI journal article supplement (doi:10.3390/cells10123382), 2021-12-01
Supplement: s1 [file s1]

Article

# Differential Effects of 25-hydroxyvitamin D<sub>3</sub> Versus 1 $\alpha$ , 25-dihydroxyvitamin D<sub>3</sub> on Adipose Tissue Browning in CKD-Associated Cachexia

Robert H. Mak <sup>1\*</sup>, Uwe Querfeld <sup>2</sup>, Alex Gonzalez <sup>1</sup>, Sujana Gunta<sup>1,3</sup>, Wai W. Cheung <sup>1</sup>

<sup>1</sup> Division of Pediatric Nephrology, Rady Children's Hospital, University of California, San Diego

92093-0831, USA; [romak@health.ucsd.edu](mailto:romak@health.ucsd.edu) (R.H.K.); [w5cheung@health.ucsd.edu](mailto:w5cheung@health.ucsd.edu) (W.W.C.); [alg022@health.ucsd.edu](mailto:alg022@health.ucsd.edu) (A.G.)

<sup>2</sup> Department of Paediatric Nephrology, Charité Children's Hospital, Augustenburger Platz 1, 13353 Berlin, Germany; [uwe.querfeld@charite.de](mailto:uwe.querfeld@charite.de) (U.Q.)

<sup>3</sup> Pediatric Services, Vista Community Clinic, Vista, CA 92084; [sujana.kaushik@gmail.com](mailto:sujana.kaushik@gmail.com) (S.G.)

\* Correspondence: [romak@health.ucsd.edu](mailto:romak@health.ucsd.edu); Tel.: +1-858-822-6717; Fax: +1-858-822-6776

**Supplemental information**

**Supplemental Table S1: Immunoassay information for blood and serum chemistry, muscle adenosine triphosphate content as well as muscle and adipose tissue protein analysis.**

| <u>Blood &amp; Serum chemistry</u>   | <u>Assay information</u>                                   |
|--------------------------------------|------------------------------------------------------------|
| Bicarbonate, BUN, Ca & Pi            | VetScan Comprehensive Diagnostic Profile, Abaxix, 500-0038 |
| Creatinine                           | LC-MS/MS method (reference # 20)                           |
| 25(OH)D <sub>3</sub>                 | IDS, AC-35F1                                               |
| 1,25(OH) <sub>2</sub> D <sub>3</sub> | IDS, AC-62F1                                               |
| PTH                                  | Immutopics, 60-2305                                        |
| VDBP                                 | R&D Systems, MVDBPO                                        |

| <u>Muscle &amp; adipose tissue</u>             | <u>Assay information</u>         |
|------------------------------------------------|----------------------------------|
| ATP Assay Kit<br>(Colorimetric / Fluorometric) | Abcam, ab83355                   |
| Mouse UCP1 ELISA kits                          | Aviva Systems Biology, OKCD02970 |
| Mouse UCP3 ELISA kits                          | Aviva Systems Biology, OKEH05259 |

**Supplemental Table S2: PCR primer information**

| <b>Gene</b>              | <b>Forward primer sequence</b> | <b>Reverse primer sequence</b> |
|--------------------------|--------------------------------|--------------------------------|
| Agt                      | TCTCCTTTACCACAACAAGAGCA        | CTTCTCATTACAGGGGAGGT           |
| Akt1                     | CTGCTCCTAGTCCACCACCT           | AGAGACCTCCATTATCGCTACC         |
| Atf3                     | GAGGATTTTGCTAACCTGACACC        | TTGACGGTAACTGACTCCAGC          |
| Atp2 $\alpha$ 2          | GAGAACGCTCACACAAAGACC          | CAATTTCGTTGGAGCCCCAT           |
| Atrogin-1                | CAGCTTCGTGAGCGACCTC            | GGCAGTCGAGAAGTCCAGTC           |
| Bmp7                     | ACGGACAGGGCTTCTCCTAC           | ATGGTGGTATCGAGGGTGGAA          |
| CD137                    | CGTGCAGAACTCCTGTGATAAC         | GTCCACCTATGCTGGAGAAGG          |
| Cidea                    | TGACATTCATGGGATTGCAGAC         | GGCCAGTTGTGATGACTAAGAC         |
| Cyfp2                    | ATGACCACCCACGTCACTTTG          | CCTGTCCTCGAAGTTCGTGTC          |
| Cox2                     | AACCCAGGGGATCGAGTGT            | CGCAGCTCAGTGTTCGGGAT           |
| Csrp3                    | GGGGGAGGTGCAAAATGTG            | CAGGCCATGCAGTGGAACA            |
| Ctgf                     | GTGGAATATTGCCGGTGCA            | CCATTGAAGCATCTTGGTTCC          |
| Dio2                     | AATTATGCCTCGGAGAAGACCG         | GGCAGTTGCCTAGTGAAAGGT          |
| Fhl1                     | GACTGCCGCAAGCCATAA             | CCAAGGGGTGAAGGCACTT            |
| Fos                      | TTGAGCGATCATCCGGTC             | GCGTGAGTCCATACTGGCAAG          |
| Gng2                     | ACCGCCAGCATAGCACAAG            | AGTAGGCCATCAAGTCAGCAG          |
| IL-1 $\alpha$            | ACGGCTGAGTTTCAGTGAGACC         | CACTCTGGTAGGTGTAAGGTGC         |
| IL-1 $\beta$             | GCAACTGTTCTGAACTCAACT          | ATCTTTTGGGGTCCGTCAACT          |
| IL-6                     | TAGTCCTTCTACCCCAATTTCC         | TTGGTCCTTAGCCACTCCTTC          |
| IL-13R $\alpha$ 2        | ACCGAAATGTTGATAGCGACAG         | ACAATGCTCTGACAAATGCGTA         |
| Itpr1                    | CGTTTTGAGTTTGAAGGCGTTT         | CATCTTGCGCCAATTCCTCG           |
| Maff                     | AGGAGGAGGTATCCGACTG            | CTTCTCGCTCTCCAGAATGTG          |
| Murf-1                   | GTGTGAGGTGCCTACTTGCTC          | GCTCAGTCTTCTGTCTTGGA           |
| Myd88                    | TCATGTTCTCCATACCCTTGGT         | AAACTGCGAGTGGGGTCAG            |
| Myl2                     | ATCGACAAGAATGACCTAAGGGA        | ATTTTTCACGTTCACTCGTCCT         |
| Myod                     | CCACTCCGGGACATAGACTTG          | AAAAGCGCAGGTCTGGTGAG           |
| Myogenin                 | GAGACATCCCCCTATTTCTACCA        | GCTCAGTCCGCTCATAGCC            |
| Myostatin                | AGTGGATCTAAATGAGGGCAGT         | GTTTCCAGGCGCAGCTTAC            |
| PAI-1                    | TCTGGGAAAGGGTTCACTTTACC        | GACACGCCATAGGGAGAGAAG          |
| Pax7                     | TCTCCAAGATTCTGTGCCGAT          | CGGGGTCTCTCTCTTATACTCC         |
| Pgc1 $\alpha$            | TATGGAGTGACATAGAGTGTGCT        | CAGGAGTTGATTCCAGACAGGTA        |
| Pgf2 $\alpha$            | CTGGACTCATCGAAACACAA           | AGGAAGCCTTTGACTTCTGTCTA        |
| Ppargc1 $\alpha$         | AGAGCCCCATCTGTCTCTC            | ACTGGTAGTCTGCAAAACCAA          |
| Prdm16                   | CCCCACATTCCGCTGTGAT            | CTCGCAATCCTTGCACTCA            |
| Tbx-1                    | CTGTGGGACGAGTTCAATCAG          | TTGTCATCTACGGGCACAAAG          |
| Tgfa1                    | TGATACGCTGAGTGGCTGTCT          | CACAAGAGCAGTGAGCGCTGAA         |
| Tgif1                    | GAACACAGATACAACGCCTATCC        | CCATCCTTTCTCAGCATGTCAG         |
| Timp3                    | CTTCTGCAACTCCGACATCGT          | GGGGCATCTTACTGAAGCCTC          |
| Tlr2                     | GCAAACGCTGTTCTGCTCAG           | AGGCGTCTCCCTCTATTGTATT         |
| Tmem26                   | TTCTGTGTCATTCCCTGGTC           | GCCGGAGAAAGCCATTTGT            |
| Tnf- $\alpha$            | CCCTCACACTCAGATCATCTTCT        | GCTACGACGTGGGCTACAG            |
| Tnnc1                    | GCGGTAGAACAGTTGACAGAG          | CCAGCTCCTTGGTGCTGAT            |
| Tpm3                     | ACCACCATCGAGGCGGTAA            | CCCTTTCCTCCGCATCATCA           |
| Traf6                    | AAAGCGAGAGATTCTTTCCCTG         | ACTGGGGACAATTCCTAGAGC          |
| Smad3                    | AAAGCGAGAGATTCTTTCCCTG         | ACTGGGGACAATTCCTAGAGC          |
| Gapdh (internal control) | AGGTCGGTGTGAACGGATTTG          | TGTAGACCATGTAGTTGAGGTCA        |
